# Supplementary material for: The Temporal Order of Genetic and Pathway Alterations in Tumorigenesis
Source: PLoS One. 2011 Nov 1;6(11):e27136. doi: 10.1371/journal.pone.0027136 (PMC3206070; doi:10.1371/journal.pone.0027136)
Supplement: Table S1 — Gene-to-pathway mapping and alteration frequencies for all colorectal cancer (A), pancreatic cancer (B), primary glioblastoma (D), and the combined data for all three tumor types (D). (XLSX) [file pone.0027136.s002.xlsx]

## Sheet: A. Colorectal Cancer
	Apoptosis	Control of G1/S phase transition	DNA damage control	Hedghehog signaling	Homophilic cell adhesion	Integrin signaling	Invasion	JNK	KRAS signaling	Small GTPase-dependent signaling (other than KRAS)	TGF-b signaling	Wnt/Notch signaling
ABCA1										x			1
ADAMTS18	x												2
ADAMTSL3													4
APC	x				x					x		x	78
BRAF	x	x							x	x		x	4
CNTN4	x	x											1
EDD1	x	x											1
EPHA3				x									5
EPHA4				x									2
EPHA7				x									1
EVC2													5
FBXW7		x		x								x	8
GNAS	x					x						x	2
GUCY1A2	x									x			4
KRAS	x	x		x					x		x		59
LGR6													1
MAP2K7													3
MMP2	x						x			x		x	2
NAV3													3
OR51E1	x												1
PIK3CA	x			x	x	x			x	x	x	x	23
PRKD1	x	x			x	x				x	x		3
RET	x	x			x								2
RUNX1T1													1
SEC8L1													2
TCF7L2	x			x	x	x						x	7
TGM3													1
TP53	x	x	x	x				x		x	x	x	54
	89	78	54	86	82	31	2	54	71	90	82	89
95 cases
An "x" denotes the membership of a gene in a given pathway.
The numbers in the last column are the number of cases with at least one a non-synonymous mutation in the corresponding gene.
The numbers in the last row are the frequencies at which a pathway is hit by at least one non-synonymous mutation in a gene member.

## Sheet: B. Pancreatic Cancer
	Apoptosis	Control of G1/S phase transition	DNA damage control	Hedghehog signaling	Homophilic cell adhesion	Integrin signaling	Invasion	JNK	KRAS signaling	Small GTPase-dependent signaling (other than KRAS)	TGF-b signaling	Wnt/Notch signaling
ABLIM2											x		1
CDH10	x				x								1
CDKN2A	x	x	x							x	x		22
CTNNA2	x				x								1
FLJ39155													1
GLTSCR1													1
GPR133													1
KRAS	x	x		x					x		x		89
MLL3	x									x			5
MYH2				x	x	x				x			2
PCDH15	x				x								1
PCDH18	x				x								1
PPP1R3A													3
PXDN					x								4
SMAD4	x	x		x				x		x	x	x	23
SMARCA4	x	x											2
SN										x			1
ST6GAL2													3
TGFBR2	x	x							x	x	x	x	6
TNR	x	x		x									1
TP53	x	x	x	x				x		x	x	x	76
TPO		x								x			2
	90	90	80	90	10	2	0	77	89	82	90	78
90 cases

## Sheet: C. Primary Glioblastoma
	Apoptosis	Control of G1/S phase transition	DNA damage control	Hedghehog signaling	Homophilic cell adhesion	Integrin signaling	Invasion	JNK	KRAS signaling	Small GTPase-dependent signaling (other than KRAS)	TGF-b signaling	Wnt/Notch signaling
ARNT2	x	x										x	1
C21orf29	x												1
DSG4	x				x								2
EGFR	x	x			x				x	x	x	x	13
FRMPD4													3
IDH1										x			7
IRX6	x												2
MYO1B		x			x						x		3
NF1	x	x							x	x			13
NGEF		x								x			1
PIK3CA	x			x	x	x			x	x	x	x	8
PIK3R1	x			x	x	x			x	x	x	x	6
PTEN	x	x			x	x			x	x	x	x	22
RB1	x	x	x							x	x		6
SCN9A										x			3
TP53	x	x	x	x				x		x	x	x	24
	67	61	29	37	45	35	0	24	51	67	65	63
78 cases

## Sheet: D. All Tumors
	Apoptosis	Control of G1/S phase transition	DNA damage control	Hedghehog signaling	Homophilic cell adhesion	Integrin signaling	Invasion	JNK	KRAS signaling	Small GTPase-dependent signaling (other than KRAS)	TGF-b signaling	Wnt/Notch signaling
ABCA1										x			1
ABLIM2											x		1
ADAMTS18	x												2
ADAMTSL3													4
APC	x				x					x		x	78
ARNT2	x	x										x	1
BRAF	x	x							x	x		x	4
C21orf29	x												1
CDH10	x				x								1
CDKN2A	x	x	x							x	x		22
CNTN4	x	x											1
CTNNA2	x				x								1
DSG4	x				x								2
EDD1	x	x											1
EGFR	x	x			x				x	x	x	x	13
EPHA3				x									5
EPHA4				x									2
EPHA7				x									1
EVC2													5
FBXW7		x		x								x	8
FLJ39155													1
FRMPD4													3
GLTSCR1													1
GNAS	x					x						x	2
GPR133													1
GUCY1A2	x									x			4
IDH1										x			7
IRX6	x												2
KRAS	x	x		x					x		x		148
LGR6													1
MAP2K7													3
MLL3	x									x			5
MMP2	x						x			x		x	2
MYH2				x	x	x				x			2
MYO1B		x			x						x		3
NAV3													3
NF1	x	x							x	x			13
NGEF		x								x			1
OR51E1	x												1
PCDH15	x				x								1
PCDH18	x				x								1
PIK3CA	x			x	x	x			x	x	x	x	31
PIK3R1	x			x	x	x			x	x	x	x	6
PPP1R3A													3
PRKD1	x	x			x	x				x	x		3
PTEN	x	x			x	x			x	x	x	x	22
PXDN					x								4
RB1	x	x	x							x	x		6
RET	x	x			x								2
RUNX1T1													1
SCN9A										x			3
SEC8L1													2
SMAD4	x	x		x				x		x	x	x	23
SMARCA4	x	x											2
SN										x			1
ST6GAL2													3
TCF7L2	x			x	x	x						x	7
TGFBR2	x	x							x	x	x	x	6
TGM3													1
TNR	x	x		x									1
TP53	x	x	x	x				x		x	x	x	154
TPO		x								x			2
	246	229	163	213	137	68	2	155	211	239	237	230
268 cases
